# Supplementary material for: Influence of Zn on the photoluminescence of colloidal (AgIn)xZn2(1−x)S2 nanocrystals
Source: Royal Society of Chemistry journal article supplement (doi:10.1039/c6cp07550a), 2017-01-01
Supplement: c6cp07550a1.pdf [file c6cp07550a1.pdf]

## Supplementary Information

### Influence of Zn on the Photoluminescence of Colloidal $(\text{AgIn})_x\text{Zn}_{2(1-x)}\text{S}_2$ Nanocrystals

Dharmendar Kumar Sharma, Shuzo Hirata, Lukasz Bujak, Vasudevanpillai Biju, Tatsuya Kameyama, Marino Kishi, Tsukasa Torimoto, Martin Vacha

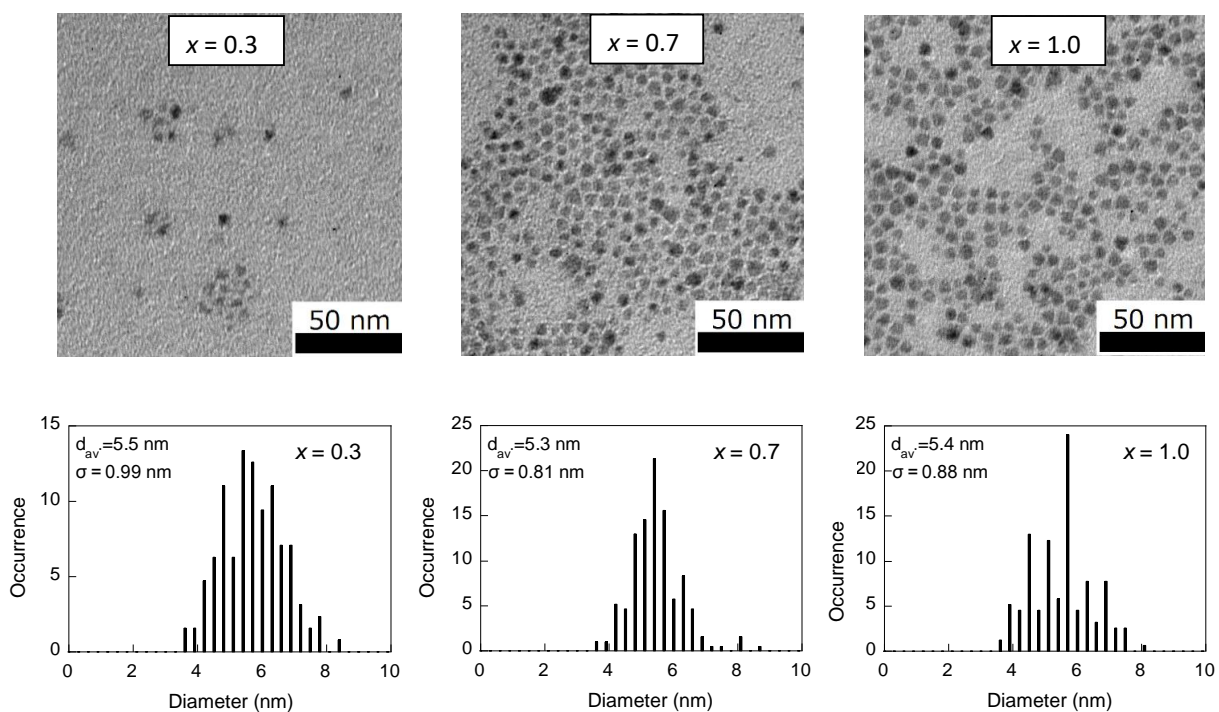

**Figure S1.** TEM images (top) and distributions of particle size (bottom) of the three compositions. The size distributions contain the statistical parameters of average size  $d_{av}$  and standard deviation  $\sigma$ .

| $x$ | Ag | In | Zn  |
|-----|----|----|-----|
| 0.3 | 14 | 22 | 64  |
| 0.7 | 34 | 40 | 26  |
| 1.0 | 48 | 52 | 0.0 |

**Table S1.** Elemental composition of the synthesized ZAIS nanocrystals measured by EDX

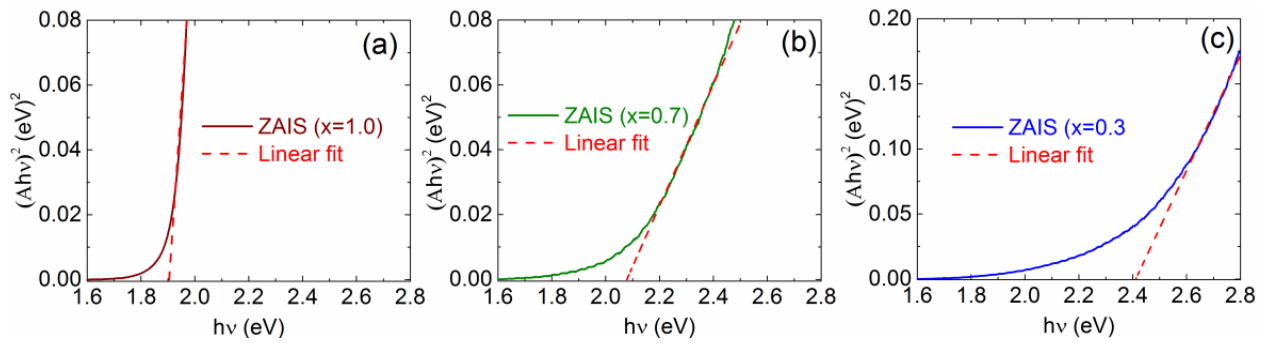

**Figure S2.** Estimation of  $E_g$  using linear part of  $Ah\nu^2$  vs.  $h\nu$  plot.

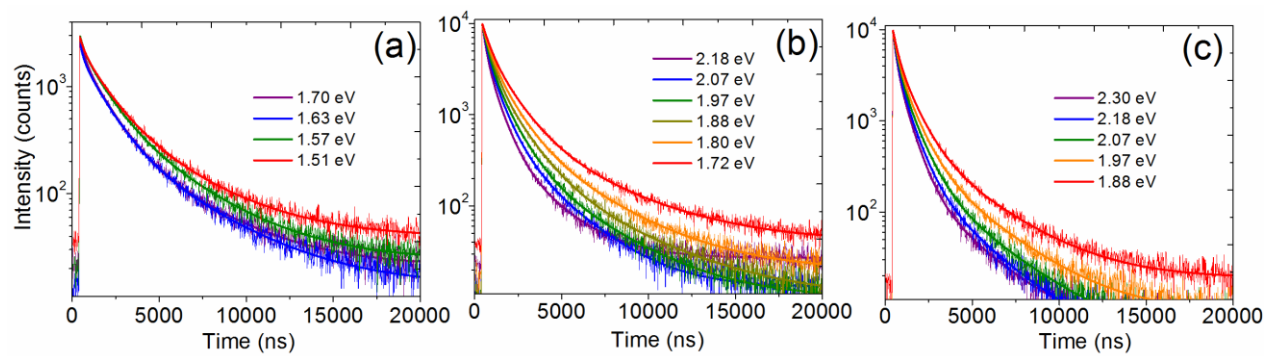

**Figure S3** Three-exponential-fitted PL intensity decay curves of ZAIS  $x = 0.3$  (a),  $x = 0.7$  (b) and  $x = 1.0$  (c) NCs at 3.4 eV excitation. The legends indicate the monitoring PL energy.

| $E_{PL}(eV)$ | $\langle\tau\rangle$ (ns) | $\tau_1$   | $\tau_2$    | $\tau_3$    | $\alpha_1$  | $\alpha_2$  | $\alpha_3$  |
|--------------|---------------------------|------------|-------------|-------------|-------------|-------------|-------------|
| <b>x=0.3</b> |                           |            |             |             |             |             |             |
| 2.30         | 811                       | 177        | 620         | 2454        | 0.56        | 0.41        | 0.02        |
| 2.18         | 878                       | 209        | 678         | 2450        | 0.56        | 0.41        | 0.03        |
| <b>2.07</b>  | <b>1017</b>               | <b>260</b> | <b>798</b>  | <b>2909</b> | <b>0.57</b> | <b>0.39</b> | <b>0.03</b> |
| 1.97         | 1174                      | 264        | 818         | 2899        | 0.51        | 0.44        | 0.05        |
| 1.88         | 1388                      | 264        | 855         | 3071        | 0.44        | 0.49        | 0.07        |
| <b>x=0.7</b> |                           |            |             |             |             |             |             |
| 2.18         | 929                       | 211        | 670         | 2243        | 0.52        | 0.43        | 0.05        |
| 2.07         | 1104                      | 234        | 736         | 2496        | 0.47        | 0.46        | 0.06        |
| 1.97         | 1294                      | 326        | 988         | 3345        | 0.56        | 0.40        | 0.04        |
| 1.88         | 1518                      | 436        | 1298        | 4261        | 0.64        | 0.33        | 0.03        |
| <b>1.80</b>  | <b>1647</b>               | <b>414</b> | <b>1160</b> | <b>3639</b> | <b>0.50</b> | <b>0.43</b> | <b>0.06</b> |
| 1.72         | 1947                      | 428        | 1272        | 4181        | 0.45        | 0.48        | 0.07        |
| <b>x=1.0</b> |                           |            |             |             |             |             |             |
| 1.70         | 2194                      | 237        | 1213        | 3770        | 0.32        | 0.55        | 0.13        |
| 1.63         | 2353                      | 183        | 1227        | 3967        | 0.28        | 0.58        | 0.14        |
| 1.57         | 2388                      | 240        | 1261        | 3684        | 0.24        | 0.57        | 0.19        |
| <b>1.51</b>  | <b>2518</b>               | <b>265</b> | <b>1330</b> | <b>3814</b> | <b>0.22</b> | <b>0.57</b> | <b>0.21</b> |

**Table S2.** Energy dependent PL decay constants and their relative contributions. The averages of the decay times are calculated using  $\langle\tau\rangle = \sum_i \frac{\alpha_i \tau_i^2}{\alpha_i \tau_i}$ .

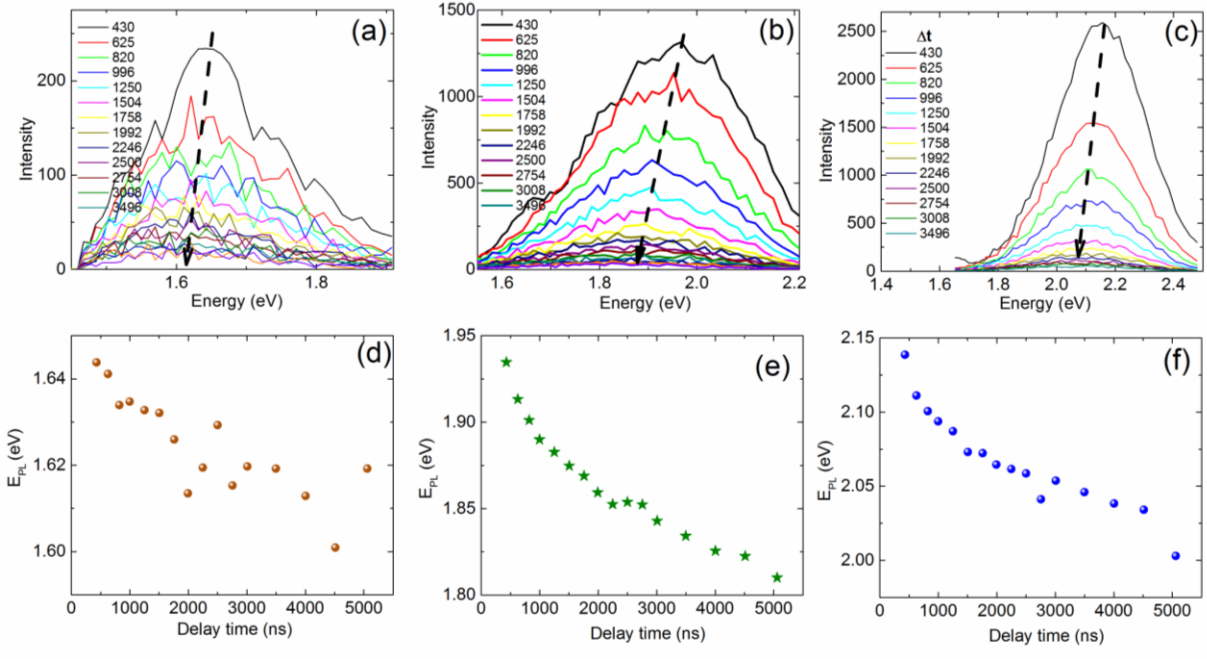

**Figure S4** Time-resolved PL spectra of ZAIS NCs for  $x=1.0$  (a),  $0.7$  (b) and  $0.3$  (c) at RT. The delay times used to reconstruct the spectra are shown in the legends in the units of ns. The peak energies of the time-resolved PL spectra were estimated by spectral fitting analysis assuming a Gaussian profile of PL and were plot for each composition ‘ $x$ ’ in (d-f).

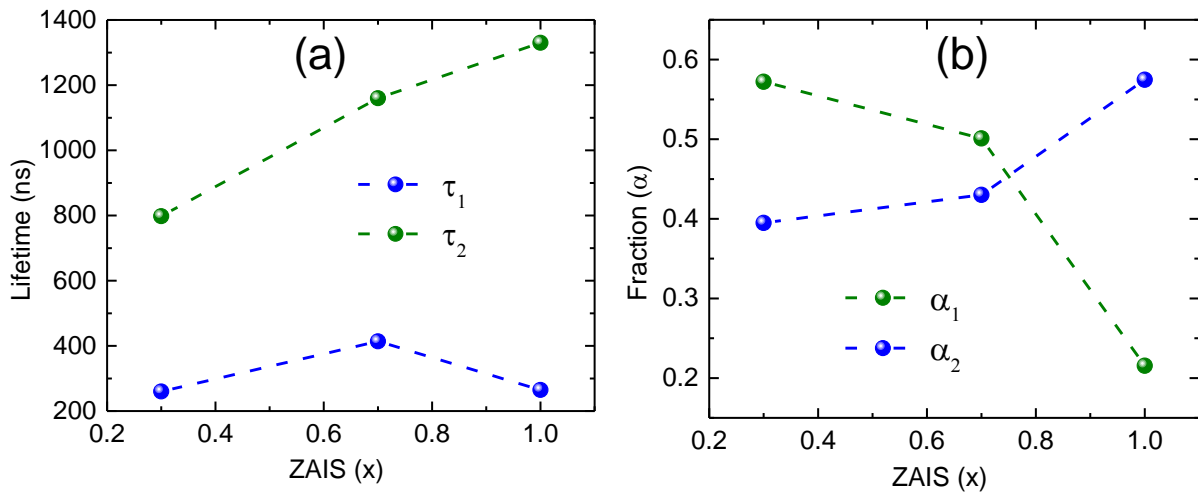

**Figure S5** Complimentary dependence of lifetimes  $\tau_1$  and  $\tau_2$  (a), and their fractions  $\alpha_1$  and  $\alpha_2$  (b) with the increasing  $x$  (decreasing Zn) in ZAIS.

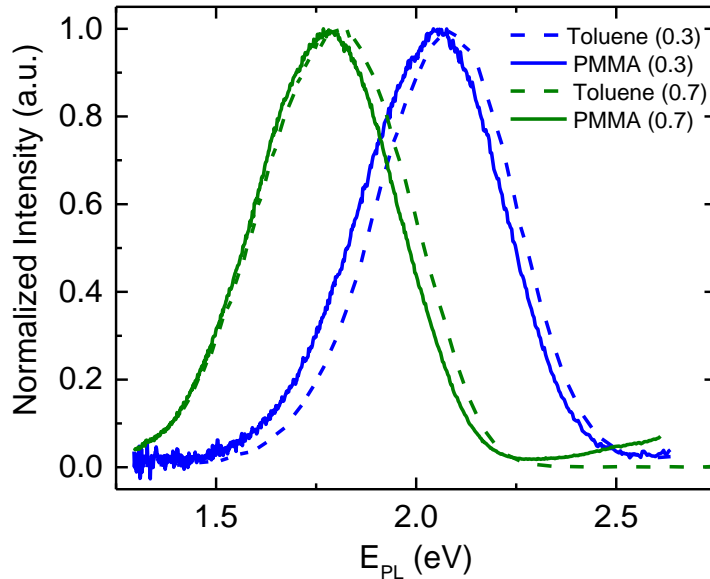

**Figure S6** Normalized PL spectra of ZAIS ( $x=0.3$ , blue and  $0.7$ , green) in toluene and PMMA film.

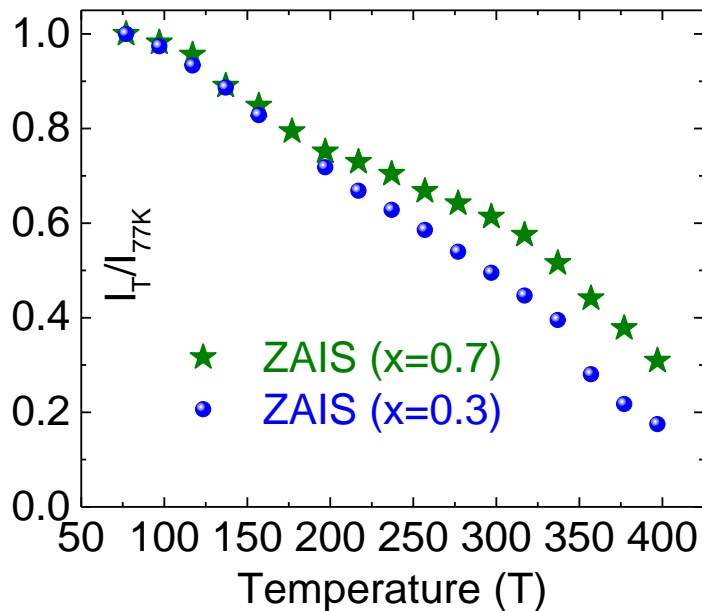

**Figure S7** Temperature dependent relative PL intensity change of ZAIS for  $x = 0.7$  (green) and  $x = 0.3$  (blue) At low temperatures, relative intensity changes are comparable, while at higher temperatures the rate of intensity decay for ZAIS ( $x = 0.7$ ) is slower as compared to ZAIS ( $x = 0.3$ ).

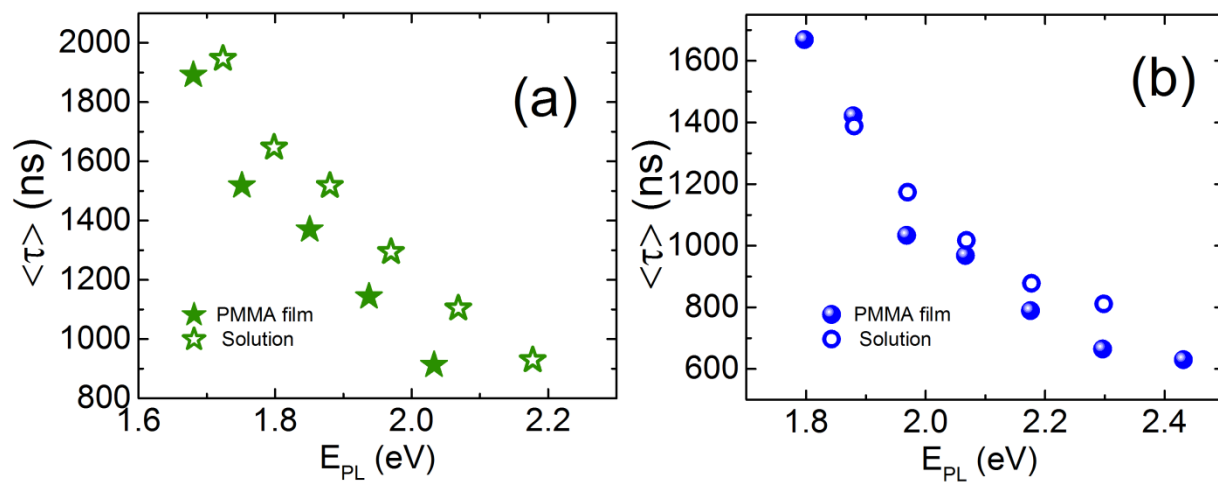

**Figure S8** Average lifetimes  $\langle \tau \rangle$  of ZAIS of  $x=0.7$  (a) and  $x=0.3$  (b) monitored at different PL energies in toluene and PMMA film.
